# Supplementary material
Source: Springer Nature journal article supplement (https://www.springermedizin.de/resource/supplementary/12916_2006_91_MOESM8_ESM.pdf/9599156)
Supplement: MOESM8 [file 9599156]

negative control  
control  
DMSO  
z-VAD-fmk  
green tea 4%  
green tea + z-VAD-fmk  
black tea 4%  
black tea + z-VAD-fmk  
EGCG 400 $\mu$ M  
EGCG + z-VAD-fmk

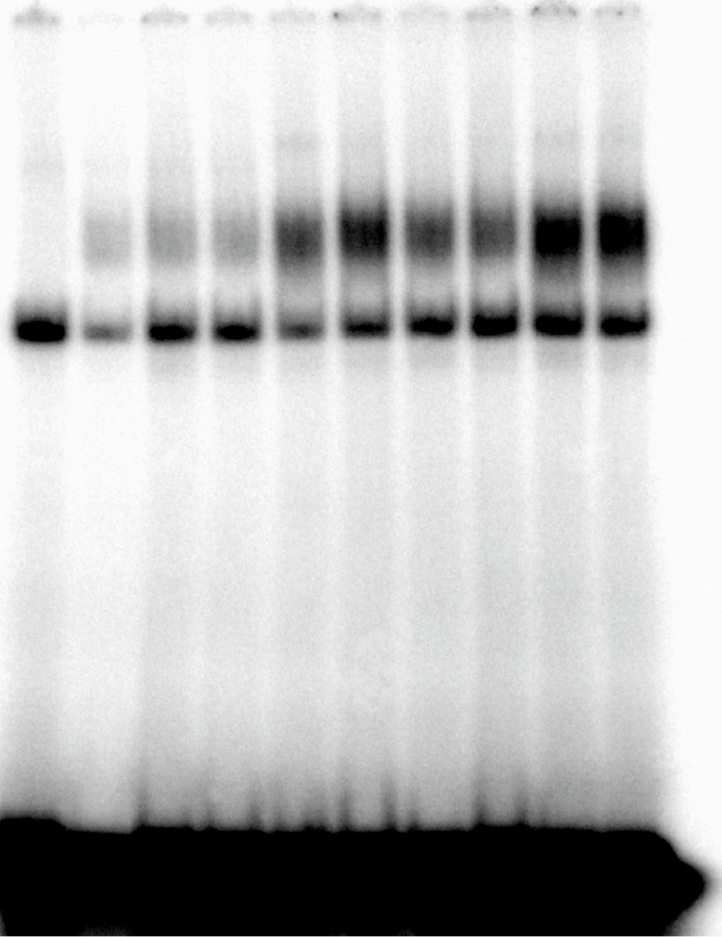

← NF-kB

← n.s.

← free oligonucleotide
